# Supplementary material for: Impact of an Extreme Typhoon Event on Subsequent Sediment Discharges and Rainfall-Driven Landslides in Affected Mountainous Regions of Taiwan
Source: Hindawi journal article supplement (doi:10.1155/2018/8126518), 2018-11-27
Supplement: f1 [file 8126518.f1.pdf]

Supplementary Materials for  
**Impact of an extreme typhoon event on subsequent sediment  
discharges and rainfall-driven landslides in affected mountainous  
regions of Taiwan**

Ching Hung, Guan-Wei Lin\*, Hsien-Li Kuo, Jia-Ming Zhang, Chi-Wen Chen  
Hongey Chen

\* Correspondence should be addressed to Guan-Wei Lin; gwlin@mail.ncku.edu.tw

This file includes:

Fig. S1

Table S1

Table S2

Table S3

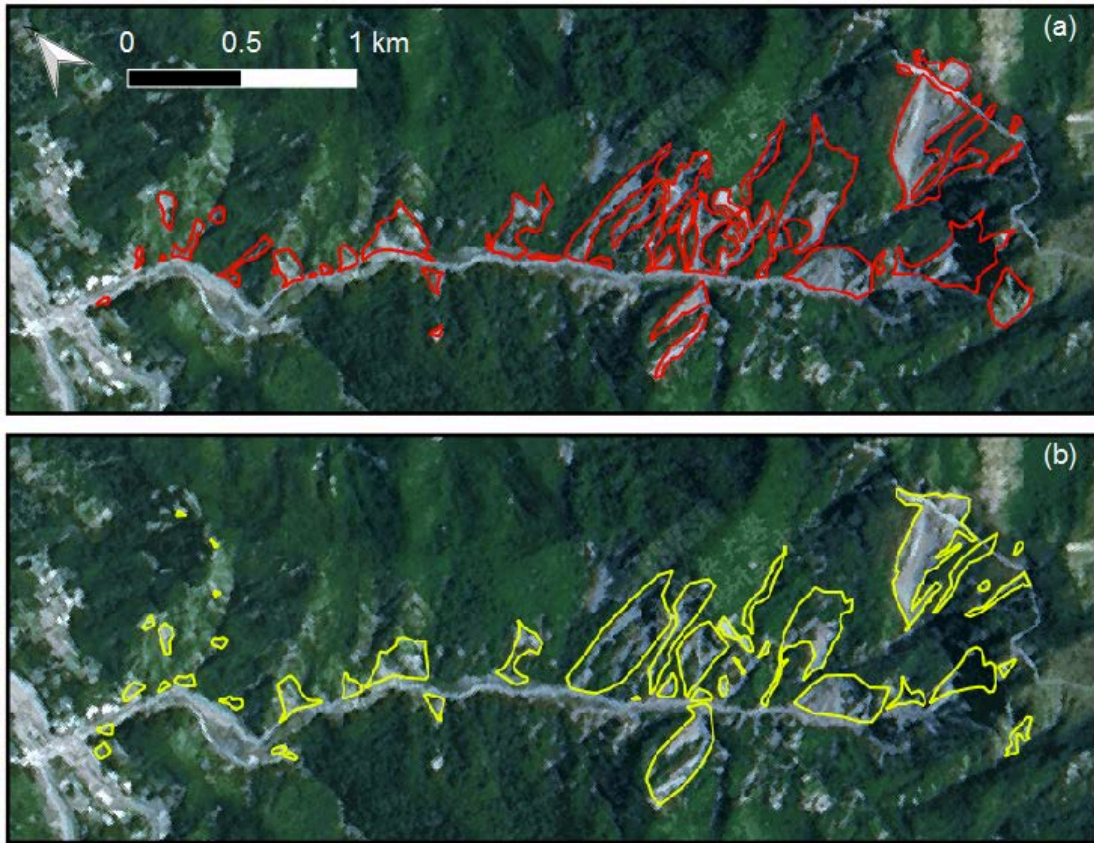

Fig. S1. Comparison of landslides inventory maps of manual and automated identification. (a) Manual identification of landslides after Typhoon Morakot using aerial photos. (b) Automated identification of landslides after Typhoon Morakot using SPOT satellite images. The automated identification has been validated with an accuracy of 92.5 % against a subcatchment of the Zhoushui River, in which, the accuracy was estimated via a confusion matrix by dividing the sum of the true positive and true negative identification areas from the total testing area:  $Accuracy = (True\ Positive\ Identification\ Area + True\ Negative\ Identification\ Area) / Total\ Testing\ Area$ .

Table S1. The yearly rating curves and observation days of SSD and water discharge:  
Zhoushui River (1510H057)

| Year | Yearly rating curves |     |         |       | Observation days |                 |
|------|----------------------|-----|---------|-------|------------------|-----------------|
|      | $\kappa$             | b   | $\beta$ | $r^2$ | SSD              | Water discharge |
| 1997 | 0.6                  | 2.1 | 0.1     | 0.86  | 30               | 365             |
| 1998 | 2.0                  | 1.9 | -0.2    | 0.94  | 30               | 365             |
| 1999 | 2.1                  | 1.9 | 0.2     | 0.94  | 30               | 365             |
| 2000 | 0.3                  | 2.3 | -0.2    | 0.87  | 30               | 366             |
| 2001 | 0.5                  | 2.3 | 0.1     | 0.95  | 31               | 365             |
| 2002 | 4.3                  | 1.8 | 0.7     | 0.71  | 34               | 362             |
| 2003 | 5.1                  | 1.7 | 2.7     | 0.84  | 31               | 365             |
| 2004 | 5.0                  | 1.8 | -0.1    | 0.94  | 30               | 366             |
| 2005 | 2.0                  | 1.9 | -0.3    | 0.92  | 30               | 365             |
| 2006 | 0.9                  | 2.0 | -0.1    | 0.94  | 28               | 365             |
| 2007 | 0.9                  | 2.0 | 0.2     | 0.85  | 29               | 364             |
| 2008 | 1.8                  | 1.9 | 0.4     | 0.92  | 31               | 366             |
| 2009 | 1.0                  | 2.0 | 0.0     | 0.95  | 22               | 365             |
| 2010 | 3.7                  | 1.9 | 0.8     | 0.94  | 21               | 365             |
| 2011 | 1.9                  | 2.0 | 0.3     | 0.93  | 29               | 365             |
| 2012 | 1.2                  | 2.0 | -0.2    | 0.98  | 31               | 366             |
| 2013 | 3.8                  | 1.8 | -0.4    | 0.93  | 29               | 365             |
| 2014 | 1.9                  | 2.0 | 0.5     | 0.93  | 27               | 365             |
| 2015 | 1.1                  | 2.0 | 0.3     | 0.94  | 30               | 365             |
| 2016 | 1.3                  | 2.0 | 0.4     | 0.81  | 27               | 366             |

Table S2. The yearly rating curves and observation days of SSD and water discharge:  
Zengwen River (1630H019)

| Year | Yearly rating curves |     |         |       | Observation days |                 |
|------|----------------------|-----|---------|-------|------------------|-----------------|
|      | $\kappa$             | b   | $\beta$ | $r^2$ | SSD              | Water discharge |
| 1997 | 1.6                  | 2.2 | 0.1     | 0.88  | 7                | 365             |
| 1998 | 1.3                  | 2.2 | -0.2    | 0.94  | 15               | 365             |
| 1999 | 10.2                 | 1.7 | -0.5    | 0.93  | 10               | 365             |
| 2000 | 0.1                  | 2.5 | 0.3     | 0.94  | 11               | 366             |
| 2001 | 3.2                  | 1.6 | 1.4     | 0.89  | 20               | 365             |
| 2002 | 30.4                 | 1.2 | 5.4     | 0.93  | 28               | 365             |
| 2003 | 25.1                 | 1.3 | 3.6     | 0.93  | 26               | 365             |
| 2004 | 21.6                 | 1.2 | 6.4     | 0.91  | 28               | 366             |
| 2005 | 14.1                 | 1.3 | 1.4     | 0.94  | 26               | 365             |
| 2006 | 17.8                 | 1.2 | 1.7     | 0.97  | 30               | 365             |
| 2007 | 23.2                 | 1.3 | 0.7     | 0.96  | 28               | 365             |
| 2008 | 16.9                 | 1.3 | 1.2     | 0.95  | 29               | 366             |
| 2009 | 5.8                  | 1.5 | 6.0     | 0.80  | 18               | 234             |
| 2010 | 7.3                  | 1.1 | 13.3    | 0.71  | 32               | 365             |
| 2011 | 19.5                 | 1.4 | 3.8     | 0.73  | 25               | 225             |
| 2012 | 7.2                  | 1.4 | 1.7     | 0.92  | 31               | 366             |
| 2013 | 22.3                 | 1.2 | 1.1     | 0.96  | 32               | 365             |
| 2014 | 20.6                 | 1.2 | 6.6     | 0.89  | 30               | 365             |
| 2015 | 28.0                 | 1.2 | 0.9     | 0.96  | 31               | 365             |
| 2016 | 17.6                 | 1.3 | -0.2    | 0.95  | 32               | 366             |

Table S3. The yearly rating curves and observation days of SSD and water discharge:  
Gaoping River (1730H043)

| Year | Yearly rating curves |     |         |       | Observation days |                 |
|------|----------------------|-----|---------|-------|------------------|-----------------|
|      | $\kappa$             | b   | $\beta$ | $r^2$ | SSD              | Water discharge |
| 1997 | 1.6                  | 1.7 | 0.1     | 0.78  | 14               | 365             |
| 1998 | 0.9                  | 1.8 | 0.0     | 0.96  | 17               | 365             |
| 1999 | 3.4                  | 1.4 | 6.0     | 0.80  | 30               | 365             |
| 2000 | 0.8                  | 1.7 | 1.5     | 0.91  | 32               | 366             |
| 2001 | 2.6                  | 1.6 | 3.7     | 0.73  | 31               | 365             |
| 2002 | 0.8                  | 1.7 | -0.3    | 0.66  | 30               | 365             |
| 2003 | 0.4                  | 1.7 | 0.9     | 0.77  | 29               | 365             |
| 2004 | 0.8                  | 1.6 | -0.8    | 0.54  | 18               | 366             |
| 2005 | 0.4                  | 2.0 | 0.1     | 0.94  | 22               | 254             |
| 2006 | 0.9                  | 1.7 | 0.3     | 0.91  | 30               | 365             |
| 2007 | 0.8                  | 1.6 | -0.3    | 0.84  | 18               | 365             |
| 2008 | 0.4                  | 1.9 | 0.6     | 0.97  | 31               | 366             |
| 2009 | 0.9                  | 2.0 | 1.1     | 0.89  | 30               | 365             |
| 2010 | 23.5                 | 1.4 | -0.3    | 0.86  | 31               | 365             |
| 2011 | 13.7                 | 1.3 | 0.0     | 0.70  | 30               | 365             |
| 2012 | 31.5                 | 1.1 | 1.3     | 0.77  | 30               | 342             |
| 2013 | 64.5                 | 1.0 | 1.1     | 0.84  | 30               | 365             |
| 2014 | 4.1                  | 1.5 | 0.1     | 0.79  | 30               | 334             |
| 2015 | 2.9                  | 1.5 | 0.1     | 0.94  | 30               | 365             |
| 2016 | 5.5                  | 1.3 | 0.0     | 0.81  | 30               | 366             |
